# Supplementary material for: Comparison of mid-latitude single and mixed-phase cloud optical depth from co-located infrared spectrometer and backscatter LiDAR measurements
Source: Copernicus journal article supplement (doi:10.5194/amt-2021-104), 2021-04-21
Supplement: Supplementary file [file amt-2021-104-AC2-supplement.pdf]

## Reply to reviewer comments amt-2021-104-RC2

The work is very interesting and innovative. It would also have been interesting to have high spectral resolution lidar measurements of water vapor and temperature. In general this approach opens the possibility to retrieve the cloud ODs from large datasets of LiDAR measurements, which can be used to determine the climatology of this parameter. This aspect makes the work very important also for future studies.

We are grateful to the reviewer for the positive comments, which well captures the aim of this work. During the campaign, a Raman Lidar system present at the site was also operated in parallel with the other measurements (dataset can be downloaded from <https://fts.fi.ino.it/forum/firmos/zugspitze-dataset/>) but only manually for very few (four) thin cirrus cases, which are not relevant for this work.
